# Supplementary material
Source: PubMed Central journal article supplement (PMC2860908)
Supplement: JCI41502sd.pdf [file JCI41502sd.pdf]

## SUPPLEMENTAL DATA

### SUPPLEMENTAL FIGURES

**Figure S1. Importance of the P5 peptide residue in T cell polyclonal response.** Removal of the P5 side chain for both 2.5mi 9Q (left) and HEL<sub>11-27</sub> (right) peptides results in loss of reactivity. Mice were immunized with either 2.5mi 9Q or HEL<sub>11-27</sub> peptides (5 µg of peptide+CFA). Draining lymph nodes were harvested at day 8, and CD4<sup>+</sup> T cells were purified by magnetic sorting and used for proliferation against increasing doses of the immunizing peptide or variants bearing Gly P5 in the presence of irradiated splenocytes. Identification: 2.5mi 9Q peptide (closed circles), 2.5mi 5G 9Q peptide (closed squares), HEL<sub>11-27</sub> peptide (open triangles), HEL<sub>11-27</sub> 5G peptide (open squares). Values are the mean of duplicates.

# Figure S1.

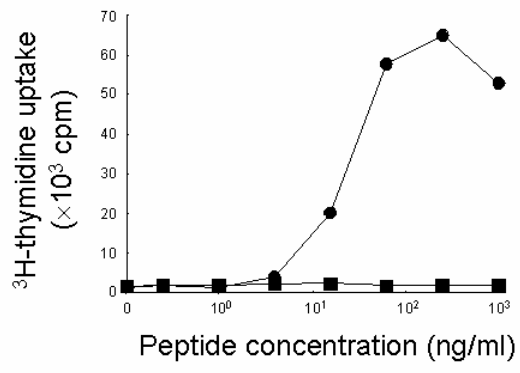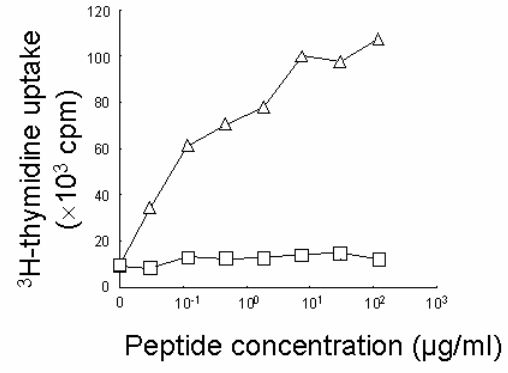

## SUPPLEMENTAL TABLES

**Table S1.** Amino acid sequences and N deletion/addition of CDR3 $\beta$  segments of GAD<sub>221-235</sub> and GAD<sub>221-235</sub>9E T cell hybridomas

### CDR3 $\beta$ sequences of GAD<sub>221</sub>-reactive T hybridomas

| Cell#  | V    | D | J   | Amino acid sequence |              |           | Nucleic acid deletion/addition |      |         |         |       |        | comments |
|--------|------|---|-----|---------------------|--------------|-----------|--------------------------------|------|---------|---------|-------|--------|----------|
|        |      |   |     | Vb                  | nDbn         | Jb        | Vb del                         | add* | D5' del | D3' del | add** | Jb del |          |
| cl.26  | 12-1 | 1 | 1-3 | FCASS               | <b>DRA</b>   | GNTLYFGE  | ✓                              | -    | ✓       | ✓       | -     | ✓      |          |
| cl.29  | 13-3 | 1 | 1-6 | FCAS                | <b>RDRGD</b> | SPLYFAA   | ✓                              | -    | ✓       | ✓       | ✓     | ✓      |          |
| cl.53  | 3    | 1 | 2-5 | FCASS               | PSGRG        | DTQYFGP   | ✓                              | ✓    | ✓       | ✓       | -     | ✓      |          |
| cl.58  | 13-2 | ? | 2-5 | FCASG               | <b>ERY</b>   | QDTQYFGP  | ✓                              | ✓    | ✓       | ✓       | ✓     | ✓      |          |
| cl.60  | 3    | 1 | 2-5 | FCASS               | PSGRG        | DTQYFGP   | ✓                              | ✓    | ✓       | ✓       | -     | ✓      |          |
| cl.76  | 13-3 | 1 | 2-3 | FCASS               | <b>EGN</b>   | SAETLYFGS | ✓                              | -    | ✓       | ✓       | ✓     | -      |          |
| cl.79  | 16   | 2 | 2-5 | LCASS               | <b>PRDWG</b> | QDTQYFGP  | ✓                              | ✓    | -       | ✓       | ✓     | ✓      |          |
| cl.82  | 3    | 2 | 2-1 | FCASSL              | <b>DWG</b>   | YAEQFFGP  | ✓                              | ✓    | ✓       | ✓       | -     | ✓      |          |
| cl.86  | 16   | 1 | 1-3 | LCASS               | <b>DQGAP</b> | GNTLYFGE  | ✓                              | ✓    | ✓       | -       | ✓     | ✓      |          |
| cl.102 | 19   | 1 | 1-5 | LCASSI              | ST           | NNQAPLFG  | ✓                              | ✓    | ✓       | ✓       | -     | ✓      |          |
| cl.103 | 13-2 | ? | 2-5 | FCASG               | <b>ERY</b>   | QDTQYFGP  | ✓                              | ✓    | ✓       | ✓       | ✓     | ✓      |          |
| cl.105 | 19   | 1 | 1-5 | LCASSI              | ST           | NNQAPLFG  | ✓                              | ✓    | ✓       | ✓       | -     | ✓      |          |
| cl.108 | 16   | 1 | 1-3 | LCASS               | <b>DQGAP</b> | GNTLYFGE  | ✓                              | ✓    | ✓       | -       | ✓     | ✓      |          |

### CDR3 $\beta$ sequences of GAD<sub>221</sub>9E-reactive T hybridomas

| Cell#  | V    | D | J   | Amino acid sequence |              |           | Nucleic acid deletion/addition |      |         |         |       |        | comments |
|--------|------|---|-----|---------------------|--------------|-----------|--------------------------------|------|---------|---------|-------|--------|----------|
|        |      |   |     | Vb                  | nDbn         | Jb        | Vb del                         | add* | D5' del | D3' del | add** | Jb del |          |
| cl.34  | 13-2 | 1 | 1-6 | FCAS                | GTGG         | YNSPLYFAA | ✓                              | ✓    | ✓       | ✓       | -     | ✓      |          |
| cl.52  | 19   | ? | 1-6 | LCASS               | RT           | YNSPLYFAA | ✓                              | ✓    | ✓       | ✓       | -     | ✓      |          |
| cl.60  | 2    | 1 | 2-7 | FCASS               | <b>LRDRD</b> | EQYFGP    | ✓                              | ✓    | -       | ✓       | ✓     | ✓      |          |
| cl.66  | 16   | ? | 2-7 | LCASSL              | AGN          | EQYFGP    | ✓                              | ✓    | ✓       | ✓       | ✓     | ✓      |          |
| cl.92  | 16   | 1 | 2-7 | LCASS               | QGQGD        | EQYFGP    | ✓                              | ✓    | ✓       | ✓       | ✓     | ✓      |          |
| cl.110 | 3    | 1 | 2-5 | FCASS               | PSGRG        | DTQYFGP   | ✓                              | ✓    | ✓       | ✓       | -     | ✓      |          |
| cl.119 | 19   | 2 | 2-5 | LCASSI              | <b>EGGGG</b> | QDTQYFGP  | -                              | ✓    | ✓       | ✓       | ✓     | ✓      |          |
| cl.142 | 16   | ? | 2-7 | LCASSL              | AGN          | EQYFGP    | ✓                              | ✓    | ✓       | ✓       | ✓     | ✓      |          |
| cl.164 | 5    | 1 | 2-1 | FCASSQ              | GQA          | NYAEQFFGP | ✓                              | -    | ✓       | ✓       | ✓     | -      |          |
| cl.183 | 13-3 | 1 | 2-3 | FCASS               | GHWGG        | AETLYFGS  | ✓                              | ✓    | ✓       | ✓       | -     | ✓      |          |
| cl.187 | 13-3 | 1 | 2-3 | FCASS               | GHWGG        | AETLYFGS  | ✓                              | ✓    | ✓       | ✓       | -     | ✓      |          |

T cell hybridomas were isolated after immunization with GAD<sub>221-235</sub> or GAD<sub>221-235</sub>9E peptides. Negatively charged amino acid residues in the first part of the CDR3 $\beta$  segment are highlighted in bold and red. Vb del: deletion of nucleotide(s) on 3' part of BV germline, add\*: addition of nucleotide(s) between BV and BD, D5' del: deletion of nucleotide(s) on 5' part of BD germline, D3' del: deletion of nucleotide(s) on 3' part of BD germline, add\*\*: addition of nucleotide(s) between BD and BJ, Jb del: deletion of nucleotide(s) on 5' part of BJ germline ✓: deletion or addition of nucleotide(s), -: no deletion or no addition, ✓: deletion or addition of nucleotide(s) responsible for the coding of a negatively-charged residue in the first part of CDR3 $\beta$ . The amino acid sequences after "CTC" in TRBV1, "LCG" in TRBV20, "CAW" in TRBV31, or "CAS" in all other TRBVs and before "YF", "FF" "TF" or "LF" in TRBJs were defined as CDR3 $\beta$ . The N-terminal region of CDR3 $\beta$  was defined as the first half of CDR3 $\beta$ .

**Table S2.** Nucleotide sequences of GAD<sub>221-235</sub> and GAD<sub>221-235</sub><sup>9E</sup> T cell hybridoma CDR3 $\beta$  segments

**CDR3 $\beta$  sequences of GAD<sub>221</sub>-reactive T hybridomas**

| Cell#  | BV   | BD | BJ  | Nucleic acid sequence     |                     |                                     |
|--------|------|----|-----|---------------------------|---------------------|-------------------------------------|
|        |      |    |     | Vb germline               | nDbn                | Jb germline                         |
| cl.26  | 12-1 | 1  | 1-3 | ttc tgt gcc agc tct       | gac agg g           | ct gga aat acg ctc tat ttt gga gaa  |
| cl.29  | 13-3 | 1  | 1-6 | ttc tgt gcc agc ag        | g gac agg ggg g     | at tcg ccc ctc tac ttt gcg gca      |
| cl.53  | 3    | 1  | 2-5 | ttc tgt gcc agc agc       | ccc tcg ggg agg ggg | gac acc cag tac ttt ggg cca         |
| cl.58  | 13-2 | ?  | 2-5 | ttc tgt gcc agc ggt ga    | a cgg ta            | c caa gac acc cag tac ttt ggg cca   |
| cl.60  | 3    | 1  | 2-5 | ttc tgt gcc agc agc       | ccc tcg ggg agg ggg | gac acc cag tac ttt ggg cca         |
| cl.76  | 13-3 | 1  | 2-3 | ttc tgt gcc agc agt ga    | a ggc aat           | agt gca gaa acg ctg tat ttt ggc tca |
| cl.79  | 16   | 2  | 2-5 | ctt tgt gca agc agc       | ccc cgg gac tgg ggt | caa gac acc cag tac ttt ggg cca     |
| cl.82  | 3    | 2  | 2-1 | ttc tgt gcc agc agc tta g | at tgg gg           | c tat gct gag cag ttc ttc gga cca   |
| cl.86  | 16   | 1  | 1-3 | ctt tgt gca agc agc       | gac cag ggg gcg c   | ct gga aat acg ctc tat ttt gga gaa  |
| cl.102 | 19   | 1  | 1-5 | ctc tgt gcc agc agt ata   | tcc aca             | aac aac cag gct cgg ctt ttt gga gag |
| cl.103 | 13-2 | ?  | 2-5 | ttc tgt gcc agc ggt ga    | a cgg ta            | c caa gac acc cag tac ttt ggg cca   |
| cl.105 | 19   | 1  | 1-5 | ctc tgt gcc agc agt ata   | tcc aca             | aac aac cag gct cgg ctt ttt gga gag |
| cl.108 | 16   | 1  | 1-3 | ctt tgt gca agc agc       | gac cag ggg gcg c   | ct gga aat acg ctc tat ttt gga gaa  |

**CDR3 $\beta$  sequences of GAD<sub>221</sub><sup>9E</sup>-reactive T hybridomas**

| Cell#  | BV   | BD | BJ  | Nucleic acid sequence     |                     |                                        |
|--------|------|----|-----|---------------------------|---------------------|----------------------------------------|
|        |      |    |     | Vb germline               | nDbn                | Jb germline                            |
| cl.34  | 13-2 | 1  | 1-6 | ttc tgt gcc agc gg        | a aca ggg gg        | c tat aat tcg ccc ctc tac ttt gcg gca  |
| cl.52  | 19   | ?  | 1-6 | ctc tgt gcc agc agt       | cgg a               | cc tat aat tcg ccc ctc tac ttt gcg gca |
| cl.60  | 2    | 1  | 2-7 | ttc tgt gcc agc agc c     | tc cgg gac agg gac  | gaa cag tac ttc ggt ccc                |
| cl.66  | 16   | ?  | 2-7 | ctt tgt gca agc agc tta g | cg ggc a            | at gaa cag tac ttc ggt ccc             |
| cl.92  | 16   | 1  | 2-7 | ctt tgt gca agc agc       | caa gga cag ggc g   | at gaa cag tac ttc ggt ccc             |
| cl.110 | 3    | 1  | 2-5 | ttc tgt gcc agc agc       | ccc tcg ggg agg ggg | gac acc cag tac ttt ggg cca            |
| cl.119 | 19   | 2  | 2-5 | ctc tgt gcc agc agt ata g | aa ggt ggg ggg ggt  | caa gac acc cag tac ttt ggg cca        |
| cl.142 | 16   | ?  | 2-7 | ctt tgt gca agc agc tta g | cg ggc a            | at gaa cag tac ttc ggt ccc             |
| cl.164 | 5    | 1  | 2-1 | ttt tgt gcc agc agc caa g | ga cag gc           | t aac tat gct gag cag ttc ttc gga cca  |
| cl.183 | 13-3 | 1  | 2-3 | ttc tgt gcc agc agt g     | gt cac tgg ggg g    | gt gca gaa acg ctg tat ttt ggc tca     |
| cl.187 | 13-3 | 1  | 2-3 | ttc tgt gcc agc agt g     | gt cac tgg ggg g    | gt gca gaa acg ctg tat ttt ggc tca     |

T cell hybridomas were isolated after immunization with GAD<sub>221-235</sub> or GAD<sub>221-235</sub><sup>9E</sup> peptides.

**Table S3.** Amino acid sequences and N deletion/addition of CDR3 $\beta$  segments of I-A<sup>97</sup>BDC2.5 9G and 9D tetramer-reactive T cells

**TCR CDR3 $\beta$  sequences of I-A<sup>97</sup>BDC2.5 9G/tet SP CD4 T cells**

| Cell# | V    | D | J   | Amino acid sequence |        |           | Nucleic acid deletion/addition |      |         |         |       |        | comments                 |
|-------|------|---|-----|---------------------|--------|-----------|--------------------------------|------|---------|---------|-------|--------|--------------------------|
|       |      |   |     | Vb                  | nDbn   | Jb        | Vb del                         | add* | D5' del | D3' del | add** | Jb del |                          |
| 1     | 19   | 1 | 2-5 | LCASS               | LLGGR  | DTQYFGP   | ✓                              | ✓    | ✓       | -       | ✓     | ✓      |                          |
|       | 13-2 | 2 | 2-7 | FCASSG              | DWG    | YEQYFGP   | ✓                              | -    | ✓       | ✓       | -     | ✓      |                          |
| 3     | 29   | 1 | 2-1 | FCASS               | PTAGD  | YAEQFFGP  | ✓                              | ✓    | ✓       | ✓       | ✓     | ✓      |                          |
| 4     | 29   | 1 | 2-1 | FCASS               | PTAGD  | YAEQFFGP  | ✓                              | ✓    | ✓       | ✓       | ✓     | ✓      |                          |
| 9     | 3    | 1 | 2-7 | FCASS               | PDI    | YEQYFGP   | ✓                              | ✓    | ✓       | ✓       | ✓     | -      |                          |
| 11    | 5    | ? | 2-7 | FCASSQ              | DVQS   | SYEQYFGP  | -                              | ✓    | ✓       | ✓       | ✓     | ✓      |                          |
| 13    | 13-2 | 1 | 1-1 | FCASSG              | EGGGG  | TEVFFGK   | ✓                              | -    | ✓       | -       | ✓     | ✓      |                          |
| 14    | 13-2 | ? | 1-5 | FCASSG              | GE     | NNQAPLFGE | -                              | -    | -       | ✓       | ✓     | ✓      | D:germline               |
|       | 15   | 2 | 2-7 | LCAS                | SQTG   | YEQYFGP   | ✓                              | ✓    | ✓       | ✓       | -     | ✓      |                          |
| 17    | 4    | 2 | 2-3 | LCASS               | YLGGH  | AETLYFGS  | ✓                              | ✓    | ✓       | -       | ✓     | ✓      |                          |
| 19    | 5    | 1 | 2-7 | FCASS               | WDRG   | YEQYFGP   | ✓                              | ✓    | -       | ✓       | -     | ✓      |                          |
| 20    | 5    | 1 | 2-1 | FCASSQ              | GQA    | NYAEQFFGP | ✓                              | -    | ✓       | ✓       | ✓     | -      |                          |
|       | 15   | 1 | 2-4 | LCASSL              | DRGDG  | QNTLYFGA  | ✓                              | -    | ✓       | ✓       | ✓     | ✓      |                          |
| 22    | 19   | 1 | 2-7 | LCASSI              | ELRQG  | YEQYFGP   | -                              | ✓    | ✓       | ✓       | -     | ✓      |                          |
| 24    | 5    | ? | 2-2 | FCASSQ              | G      | NTGQLYFGE | ✓                              | -    | ✓       | ✓       | -     | ✓      |                          |
| 25    | 19   | 1 | 2-5 | LCASS               | IRDR   | DTQYFGP   | ✓                              | ✓    | ✓       | ✓       | ✓     | ✓      |                          |
| 28    | 13-2 | 2 | 2-7 | FCASSG              | GTGGD  | EQYFGP    | ✓                              | -    | ✓       | ✓       | ✓     | ✓      |                          |
| 29    | 13-2 | 2 | 2-3 | FCASSG              | GTGA   | SAETLYFGS | ✓                              | -    | ✓       | ✓       | ✓     | -      |                          |
| 34    | 13-2 | 1 | 2-5 | FCASSG              | EGQ    | NQDTQYFGP | ✓                              | -    | ✓       | ✓       | ✓     | -      |                          |
| 35    | 13-2 | 1 | 1-6 | FCASSG              | RG     | NSPLYFAA  | ✓                              | -    | ✓       | ✓       | ✓     | ✓      | D:germline               |
| 38    | 13-2 | 1 | 2-1 | FCASSG              | GTD    | YAEQFFGP  | ✓                              | -    | ✓       | ✓       | -     | ✓      |                          |
| 42    | 13-2 | 2 | 1-2 | FCASSG              | DA     | NSDYTFGS  | -                              | ✓    | ✓       | ✓       | -     | -      | D <sup>+</sup> :germline |
| 43    | 31   | 1 | 2-1 | LCAWS               | LEGGA  | YAEQFFGP  | -                              | ✓    | ✓       | ✓       | ✓     | ✓      |                          |
| 45    | 20   | 2 | 2-5 | YLCGAR              | TGGA   | QDTQYFGP  | ✓                              | -    | ✓       | ✓       | ✓     | ✓      |                          |
| 52    | 4    | 2 | 2-3 | LCASS               | YLGGH  | AETLYFGS  | ✓                              | ✓    | ✓       | ✓       | ✓     | ✓      |                          |
| 53    | 13-2 | ? | 2-5 | FCASSG              | GG     | DTQYFGP   | -                              | -    | ✓       | ✓       | -     | ✓      | D:germline               |
| 55    | 15   | 2 | 2-5 | LCAS                | SPTGGG | QDTQYFGP  | ✓                              | ✓    | ✓       | ✓       | ✓     | ✓      |                          |
| 56    | 3    | 2 | 2-5 | FCASS               | FTGV   | QDTQYFGP  | ✓                              | ✓    | ✓       | ✓       | ✓     | ✓      |                          |
| 57    | 1    | 1 | 2-4 | YCTCS               | GQG    | QNTLYFGA  | ✓                              | -    | ✓       | ✓       | -     | ✓      |                          |
| 58    | 13-2 | 2 | 2-1 | FCASSG              | EDWG   | NYAEQFFGP | ✓                              | ✓    | ✓       | ✓       | -     | ✓      |                          |
| 63    | 19   | 1 | 1-2 | LCASS               | PTGEG  | SDYTFGS   | ✓                              | ✓    | ✓       | ✓       | ✓     | ✓      |                          |

**TCR V $\beta$  sequences of I-A<sup>97</sup>BDC2.5 9D/tet SP CD4 T cells**

| Cell# | V    | D | J   | Amino acid sequence |        |           | Nucleic acid deletion/addition |      |         |         |       |        | comments |
|-------|------|---|-----|---------------------|--------|-----------|--------------------------------|------|---------|---------|-------|--------|----------|
|       |      |   |     | Vb                  | nDbn   | Jb        | Vb del                         | add* | D5' del | D3' del | add** | Jb del |          |
| 1     | 29   | 1 | 2-1 | FCASS               | PTAGD  | YAEQFFGP  | ✓                              | ✓    | ✓       | ✓       | ✓     | ✓      |          |
| 5     | 19   | 1 | 2-1 | LCASS               | PTGGAD | YAEQFFGP  | ✓                              | ✓    | ✓       | -       | ✓     | ✓      |          |
|       | 29   | 1 | 2-1 | FCASS               | PTAGD  | YAEQFFRP  | ✓                              | ✓    | ✓       | ✓       | ✓     | ✓      |          |
| 8     | 29   | 1 | 2-1 | FCASS               | PTAGD  | YAEQFFGP  | ✓                              | ✓    | ✓       | ✓       | ✓     | ✓      |          |
| 9     | 15   | 1 | 1-1 | LCASS               | RQ     | TEVFFGK   | ✓                              | ✓    | ✓       | ✓       | -     | ✓      |          |
|       | 3    | 2 | 2-7 | FCASSL              | TV     | YEQYFGP   | ✓                              | -    | ✓       | ✓       | ✓     | ✓      |          |
| 16    | 2    | 2 | 2-7 | FCASSQ              | DGLGG  | EQYFGP    | -                              | ✓    | ✓       | ✓       | -     | ✓      |          |
| 18    | 29   | 1 | 2-1 | FCASS               | PTAGD  | YAEQFFGP  | ✓                              | ✓    | ✓       | ✓       | -     | ✓      |          |
| 26    | 13-3 | 1 | 1-3 | FCASS               | WDRA   | GNTLYFGE  | ✓                              | ✓    | -       | ✓       | -     | ✓      |          |
| 27    | 13-3 | 1 | 1-3 | FCASS               | WDRA   | GNTLYFGE  | ✓                              | ✓    | -       | ✓       | -     | ✓      |          |
| 32    | 2    | 2 | 2-3 | FCASS               | PNWGGT | ETLYFGS   | ✓                              | ✓    | ✓       | -       | ✓     | ✓      |          |
| 33    | 31   | 1 | 2-3 | LCAWS               | LLGGR  | AETLYFGS  | -                              | -    | ✓       | -       | ✓     | ✓      |          |
| 35    | 1    | 2 | 2-4 | YCTCSA              | DWG    | SQNTLYFGA | -                              | -    | ✓       | ✓       | -     | -      |          |
| 36    | 13-3 | 1 | 2-5 | FCAS                | RDI    | NQDTQYFGP | ✓                              | -    | ✓       | ✓       | ✓     | -      |          |
| 42    | 13-3 | 1 | 2-7 | FCAS                | SGTGGG | YEQYFGP   | ✓                              | ✓    | -       | -       | ✓     | ✓      |          |
| 48    | 15   | 2 | 2-7 | LCAS                | SQTG   | YEQYFGP   | ✓                              | ✓    | ✓       | ✓       | -     | ✓      |          |
| 55    | 15   | 1 | 2-4 | LCASSL              | YK     | NTRYFGA   | ✓                              | ✓    | ✓       | ✓       | -     | ✓      |          |
| 61    | 4    | 1 | 2-7 | LCASS               | YGTD   | SYEQYFGP  | ✓                              | ✓    | -       | ✓       | ✓     | -      |          |
| 75    | 1    | 1 | 1-1 | YCTCSA              | TTGT   | NTEVFFGK  | ✓                              | ✓    | ✓       | ✓       | ✓     | -      |          |
| 82    | 13-3 | 1 | 1-2 | FCASS               | GQP    | NSDYTFGS  | ✓                              | ✓    | ✓       | ✓       | ✓     | -      |          |

|    |      |   |     |        |              |          |   |   |   |   |   |   |  |
|----|------|---|-----|--------|--------------|----------|---|---|---|---|---|---|--|
| 87 | 12-2 | 1 | 2-5 | FCASSL | <u>GTGS</u>  | DTQYFGP  | - | - | - | ✓ | ✓ | ✓ |  |
| 95 | 29   | 1 | 2-1 | FCASS  | <u>PTAGD</u> | YAEQFFGP | ✓ | ✓ | ✓ | ✓ | ✓ | ✓ |  |
|    | 4    | 1 | 2-7 | LCASS  | <u>YGTD</u>  | SYEQYFGP | ✓ | ✓ | - | ✓ | ✓ | - |  |

Individual T cells sorted after tetramer labeling were used for RT-PCR and sequencing. Negatively charged amino acid residues in the first part of the CDR3 $\beta$  segment are highlighted in bold and red. Vb del: deletion of nucleotide(s) on 3' part of BV germline, add\*: addition of nucleotide(s) between BV and BD, D5' del: deletion of nucleotide(s) on 5' part of BD germline, D3' del: deletion of nucleotide(s) on 3' part of BD germline, add\*\*: addition of nucleotide(s) between BD and BJ, Jb del: deletion of nucleotide(s) on 5' part of BJ germline ✓: deletion or addition of nucleotide(s), -: no deletion or no addition, ✓: deletion or addition of nucleotide(s) responsible for the coding of a negatively-charged residue in the first part of CDR3 $\beta$ , +: first "D" in the Vb. The amino acid sequences after "CTC" in TRBV1, "LCG" in TRBV20, "CAW" in TRBV31, or "CAS" in all other TRBVs and before "YF", "FF" "TF" or "LF" in TRBJs were defined as CDR3 $\beta$ . The N-terminal region of CDR3 $\beta$  was defined as the first half of CDR3 $\beta$ .

**Table S4.** Nucleotide sequences of CDR3 $\beta$  segments of I-A<sup>97</sup>BDC2.5 9G and 9D tetramer-reactive T cells

**TCR CDR3 $\beta$  sequences of I-A<sup>97</sup>BDC2.5 9G/tet SP CD4 T cells**

| Cell# | BV   | BD | BJ  | Nucleic acid sequence      |                       |                                       |
|-------|------|----|-----|----------------------------|-----------------------|---------------------------------------|
|       |      |    |     | Vb germline                | nDbn                  | Jb germline                           |
| 1     | 19   | 1  | 2-5 | ctc tgt gcc agc agt        | cta ctg ggg ggg cgc   | gac acc cag tac ttt ggg cca           |
|       | 13-2 | 2  | 2-7 | ttc tgt gcc agc ggt ga     | c tgg gg              | c tat gaa cag tac ttc ggt ccc         |
| 3     | 29   | 1  | 2-1 | ttc tgt gct agc agt        | cca acg gca gga g     | ac tat gct gag cag ttc ttc gga cca    |
| 4     | 29   | 1  | 2-1 | ttc tgt gct agc agt        | cca acg gca gga g     | ac tat gct gag cag ttc ttc gga cca    |
| 9     | 3    | 1  | 2-7 | ttc tgt gcc agc agc        | ccg gac at            | c tat gaa cag tac ttc ggt ccc         |
| 11    | 5    | ?  | 2-7 | ttt tgt gcc agc agc caa ga | t gtc caa ag          | c tcc tat gaa cag tac ttc ggt ccc     |
| 13    | 13-2 | 1  | 1-1 | ttc tgt gcc agc ggt ga     | a ggg ggc ggg gg      | c aca gaa gtc ttc ttt ggt aaa         |
| 14    | 13-2 | ?  | 1-5 | ttc tgt gcc agc ggt gat g  | gg gaa                | aac aac cag gct cgg ctt ttt gga gag   |
|       | 15   | 2  | 2-7 | ctg tgt gcc agc ag         | c cag act ggg         | tat gaa cag tac ttc ggt ccc           |
| 17    | 4    | 1  | 2-3 | ctc tgt gcc agc agc ta     | c ctg ggg ggg ca      | t gca gaa acg ctg tat ttt ggc tca     |
| 19    | 5    | 1  | 2-7 | ttt tgt gcc agc agc        | tgg gac agg ggg       | tat gaa cag tac ttc ggt ccc           |
| 20    | 5    | 1  | 2-1 | ttt tgt gcc agc agc caa g  | ga cag gc             | t aac tat gct gag cag ttc ttc gga cca |
|       | 15   | 1  | 2-4 | ctg tgt gcc agc agt tta g  | ac agg gga gac gg     | t caa aac acc ttg tac ttt ggt gcg     |
| 22    | 19   | 1  | 2-7 | ctc tgt gcc agc agt ata g  | aa ttg aga cag gg     | c tat gaa cag tac ttc ggt ccc ggc     |
| 24    | 5    | ?  | 2-2 | ttt tgt gcc agc agc caa g  | gg                    | aac acc ggg cag ctg tac ttt ggt gaa   |
| 25    | 19   | 1  | 2-5 | ctc tgt gcc agc agt at     | t agg gac cgg         | gac acc cag tac ttt ggg cca           |
| 28    | 13-2 | 2  | 2-7 | ttc tgt gcc agc ggt g      | gg act ggg ggg ga     | t gaa cag tac ttc ggt ccc             |
| 29    | 13-2 | 2  | 2-3 | ttc tgt gcc agc ggt g      | gg act ggg gct        | agt gca gaa acg ctg tat ttt ggc tca   |
| 34    | 13-2 | 1  | 2-5 | ttc tgt gcc agc ggt ga     | a ggg cag             | aac caa gac acc cag tac ttt ggg cca   |
| 35    | 13-2 | 1  | 1-6 | ttc tgt gcc agc ggt gat    | agg gga               | aat tgg ccc ctg tac ttt ggc gca       |
| 38    | 13-2 | 1  | 2-1 | ttc tgt gcc agc ggt g      | gg aca g              | ac tat gct gag cag ttc ttc gga cca    |
| 42    | 13-2 | 2  | 1-2 | ttc tgt gcc agc ggt gat g  | at g                  | ca aac tcc gac tac acc ttc ggc tca    |
| 43    | 31   | 1  | 2-1 | ctc tgt gcc tgg agt ct     | a gaa ggg ggc gc      | c tat gct gag cag ttc ttc gga cca     |
| 45    | 20   | 2  | 2-5 | tat ctg tgt ggt gct agg    | act ggg ggg gcg       | caa gac acc cag tac ttt ggg cca       |
| 52    | 4    | 2  | 2-3 | ctc tgt gcc agc agc ta     | c ctg ggg ggg ca      | t gca gaa acg ctg tat ttt ggc tca     |
| 53    | 13-2 | ?  | 2-5 | ttc tgt gcc agc ggt gat g  | gg gg                 | a gac acc cag tac ttt ggg cca         |
| 55    | 15   | 2  | 2-5 | ctg tgt gcc agc ag         | c ccc act ggg ggg ggt | caa gac acc cag tac ttt ggg cca       |
| 56    | 3    | 2  | 2-5 | ttc tgt gcc agc agc tt     | t act ggg gta         | caa gac acc cag tac ttt ggg cca       |
| 57    | 1    | 1  | 2-4 | tac tgc acc tgc agt g      | ga cag g              | gt caa aac acc ttg tac ttt ggt gcg    |
| 58    | 13-2 | 2  | 2-1 | ttc tgt gcc agc ggt ga     | a gac tgg ggg         | aac tat gct gag cag ttc ttc gga cca   |
| 63    | 19   | 1  | 1-2 | ctc tgt gcc agc agt        | ccg aca ggg gaa gg    | c tcc gac tac acc ttc ggc tca         |

**TCR V $\beta$  sequences of I-A<sup>97</sup>BDC2.5 9D/tet SP CD4 T cells**

| Cell# | BV   | BD | BJ  | Nucleic acid sequence      |                       |                                     |
|-------|------|----|-----|----------------------------|-----------------------|-------------------------------------|
|       |      |    |     | Vb germline                | nDbn                  | Jb germline                         |
| 1     | 29   | 1  | 2-1 | ttc tgt gct agc agt        | cca acg gca gga g     | ac tat gct gag cag ttc ttc gga cca  |
| 5     | 19   | 1  | 2-1 | ctc tgt gcc agc agt        | cca aca ggg ggc gct g | ac tat gct gag cag ttc ttc gga cca  |
|       | 29   | 1  | 2-1 | ttc tgt gct agc agt        | cca acg gca gga g     | ac tat gct gag cag ttc ttc gga cca  |
| 8     | 29   | 1  | 2-1 | ttc tgt gct agc agt        | cca acg gca gga g     | ac tat gct gag cag ttc ttc gga cca  |
| 9     | 15   | 1  | 1-1 | ctg tgt gcc agc agt        | cga cag               | aca gaa gtc ttc ttt ggt aaa         |
|       | 3    | 2  | 2-7 | ttc tgt gcc agc agc tta    | act gt                | c tat gaa cag tac ttc ggt ccc       |
| 16    | 2    | 2  | 2-7 | ttc tgt gcc agc agc caa ga | t gga ctg ggg gg      | t gaa cag tac ttc ggt ccc           |
| 18    | 29   | 1  | 2-1 | ttc tgt gct agc agt        | cca acg gca gga g     | ac tat gct gag cag ttc ttc gga cca  |
| 26    | 13-3 | 1  | 1-3 | ttc tgt gcc agc agt        | tgg gac agg g         | ct gga aat acg ctg tat ttt gga gaa  |
| 27    | 13-3 | 1  | 1-3 | ttc tgt gcc agc agt        | tgg gac agg g         | ct gga aat acg ctg tat ttt gga gaa  |
| 32    | 2    | 2  | 2-3 | ttc tgt gcc agc agc c      | ca aac tgg ggg ggc a  | ca gaa acg ctg tat ttt ggc tca      |
| 33    | 31   | 1  | 2-3 | ctc tgt gcc tgg agt ct     | a ctg ggg ggg cgc     | gca gaa acg ctg tat ttt ggc tca     |
| 35    | 1    | 2  | 2-4 | tac tgc acc tgc agt gca ga | c tgg ggg             | agt caa aac acc ttg tac ttt ggt gcg |
| 36    | 13-3 | 1  | 2-5 | ttc tgt gcc agc ag         | g gac att             | aac caa gac acc cag tac ttt ggg cca |
| 42    | 13-3 | 1  | 2-7 | ttc tgt gcc agc ag         | c ggg aca ggg ggc ggt | tat gaa cag tac ttc ggt ccc         |
| 48    | 15   | 2  | 2-7 | ctg tgt gcc agc ag         | c cag act ggg         | tat gaa cag tac ttc ggt ccc         |
| 55    | 15   | 1  | 2-4 | ctg tgt gcc agc agt tta    | tac a                 | aa aac acc ttg tac ttt ggt gcg      |
| 61    | 4    | 1  | 2-7 | ctc tgt gcc agc agc ta     | c ggg aca gaz         | c tcc tat gaa cag tac ttc ggt ccc   |
| 75    | 1    | 1  | 1-1 | tac tgc acc tgc agt gca    | acg aca ggg a         | ca aac aca gaa gtc ttc ttt ggt aaa  |
| 82    | 13-3 | 1  | 1-2 | ttc tgt gcc agc agt g      | gc caa c              | ca aac tcc gac tac acc ttc ggc tca  |
| 87    | 12-2 | 1  | 2-5 | ttc tgt gcc agc tct ctg    | ggg aca ggg agt       | gac acc cag tac ttt ggg cca         |
| 95    | 29   | 1  | 2-1 | ttc tgt gct agc agt        | cca acg gca gga g     | ac tat gct gag cag ttc ttc gga cca  |

|  |   |   |     |                        |              |                                   |
|--|---|---|-----|------------------------|--------------|-----------------------------------|
|  | 4 | 1 | 2-7 | ctc tgt gcc agc agc ta | c ggg aca ga | c tcc tat gaa cag tac ttc ggt ccc |
|--|---|---|-----|------------------------|--------------|-----------------------------------|

Individual T cells sorted after tetramer labeling were used for RT-PCR and sequencing.



**Table S5.** Amino acid sequences and N deletion/addition of CDR3 $\beta$  segments of I-A<sup>97</sup>HEL<sub>11-27</sub> 9G and 9E tetramer-reactive T cells

**TCR V $\beta$  sequences of I-A<sup>97</sup>HEL<sub>11-27</sub>/tet+ CD4 cells**

| Cell#    | V    | D | J   | Amino acid sequence |              |           | Nucleic acid deletion/addition |      |         |         |       |        | comments   |
|----------|------|---|-----|---------------------|--------------|-----------|--------------------------------|------|---------|---------|-------|--------|------------|
|          |      |   |     | Vb                  | nDbn         | Jb        | Vb del                         | add* | D5' del | D3' del | add** | Jb del |            |
| 1-2.2    | 13-3 | 1 | 1-1 | FCASS               | <b>ERTGK</b> | TEVFFGK   | ✓                              | ✓    | ✓       | ✓       | ✓     | ✓      |            |
| 1-2.3    | 13-3 | 2 | 2-5 | FCAS                | KTGG         | NQDTQYFGP | ✓                              | ✓    | ✓       | ✓       | -     | -      |            |
| 3-1.1.12 | 29   | 1 | 2-1 | FCASSL              | NRD          | YAEQFFGP  | ✓                              | ✓    | ✓       | ✓       | -     | ✓      |            |
| 3-1.1.35 | 13-3 | 1 | 1-3 | FCASS               | <b>WDRA</b>  | GNTLYFGE  | ✓                              | ✓    | -       | ✓       | -     | ✓      |            |
| 3-1.1.39 | 15   | 1 | 1-6 | LCASSL              | <b>EDRG</b>  | YNSPLYFAA | ✓                              | ✓    | ✓       | ✓       | -     | ✓      |            |
| 4-t2     | 29   | 1 | 2-7 | FCASSL              | SGTGGC       | EQYFGP    | -                              | ✓    | -       | ✓       | ✓     | ✓      |            |
| 4-t7     | 4    | 1 | 1-2 | LCAS                | RPGTGA       | SDYTFGS   | ✓                              | ✓    | -       | ✓       | ✓     | ✓      |            |
| 4-1.1.3  | 13-3 | 1 | 1-3 | FCASS               | <b>WDRA</b>  | GNTLYFGE  | ✓                              | ✓    | -       | ✓       | -     | ✓      |            |
| 4-1.1.11 | 19   | 2 | 2-7 | LCASSI              | GGTGG        | YEYQYFGP  | -                              | ✓    | -       | ✓       | -     | ✓      |            |
| 4-1.1.13 | 19   | 1 | 2-5 | LCAS                | IPGH         | QDTQYFGP  | ✓                              | ✓    | -       | ✓       | -     | ✓      |            |
| 4-1.1.14 | 5    | 2 | 2-7 | FCASSQ              | GGTGG        | YEYQYFGP  | ✓                              | ✓    | -       | ✓       | -     | ✓      |            |
| 4-1.1.15 | 13-3 | 1 | 2-7 | FCASS               | <b>ERQS</b>  | YEYQYFGP  | ✓                              | ✓    | ✓       | ✓       | ✓     | ✓      |            |
| 4-1.1.16 | 29   | 1 | 2-5 | FCAS                | <b>RRDRE</b> | DTQYFGP   | ✓                              | ✓    | -       | ✓       | ✓     | ✓      |            |
| 4-1.1.23 | 13-3 | 1 | 1-3 | FCASS               | <b>WDRA</b>  | GNTLYFGE  | ✓                              | ✓    | -       | ✓       | -     | ✓      |            |
| 4-1.1.34 | 3    | 1 | 1-2 | FCASSL              | <b>DRVG</b>  | NSDYTFGS  | ✓                              | -    | ✓       | ✓       | ✓     | ✓      |            |
| 4-1.1.53 | 13-2 | 2 | 2-7 | FCASG               | <b>EGLGG</b> | YEYQYFGP  | ✓                              | -    | -       | ✓       | -     | ✓      |            |
| 4-1.1.54 | 5    | 1 | 2-7 | FCASSQ              | <b>EGTGG</b> | YEYQYFGP  | -                              | ✓    | -       | ✓       | -     | ✓      |            |
| 4-1.1.56 | 29   | 2 | 2-7 | FCASSL              | AGTGG        | YEYQYFGP  | ✓                              | ✓    | -       | ✓       | ✓     | ✓      |            |
| 4-1.1.58 | 13-3 | 1 | 2-7 | FCASS               | <b>DRS</b>   | SYEQYFGP  | ✓                              | -    | ✓       | ✓       | ✓     | -      |            |
| 4-1.1.64 | 5    | 2 | 2-7 | FCASSQ              | <b>EGTGG</b> | YEYQYFGP  | -                              | ✓    | -       | ✓       | -     | ✓      |            |
| 4-1.1.65 | 2    | 1 | 1-2 | FCASS               | <b>EGGTT</b> | NSDYTFGS  | ✓                              | ✓    | -       | ✓       | ✓     | -      |            |
| 4-1.1.67 | 5    | 2 | 2-7 | FCASSQ              | <b>DGTGG</b> | YEYQYFGP  | -                              | ✓    | -       | ✓       | ✓     | ✓      |            |
| 4-1.1.73 | 29   | 1 | 2-1 | FCASSL              | <b>SDPR</b>  | NYAEQFFGP | -                              | ✓    | ✓       | ✓       | ✓     | ✓      |            |
| 4-1.1.91 | 13-3 | 1 | 2-7 | FCASS <b>D</b>      | AGTGG        | YEYQYFGP  | -                              | ✓    | -       | ✓       | -     | ✓      | D:germline |
| 4-1.1.96 | 13-3 | 1 | 1-3 | FCASS               | <b>WDRA</b>  | GNTLYFGE  | ✓                              | ✓    | -       | ✓       | -     | ✓      |            |

**TCR V $\beta$  sequences of I-A<sup>97</sup>HEL<sub>11-27</sub>9E/tet+ CD4 cells**

| Cell#  | V    | D  | J   | Amino acid sequence |               |           | Nucleic acid deletion/addition |      |         |         |       |        | comments   |
|--------|------|----|-----|---------------------|---------------|-----------|--------------------------------|------|---------|---------|-------|--------|------------|
|        |      |    |     | Vb                  | nDbn          | Jb        | Vb del                         | add* | D5' del | D3' del | add** | Jb del |            |
| 1-1-10 | 19   | 2  | 2-7 | LCASSI              | GGTGG         | YEYQYFGP  | -                              | ✓    | -       | ✓       | -     | ✓      |            |
| 1-1-14 | 2    | 2  | 2-4 | FCASSQ              | <b>DLV</b>    | SQNTLYFGA | -                              | ✓    | ✓       | ✓       | ✓     | -      |            |
| 1-1-18 | 19   | 1  | 2-7 | LCASSI              | AGTGG         | YEYQYFGP  | -                              | ✓    | -       | ✓       | -     | ✓      |            |
| 1-1-42 | 13-2 | 2? | 2-4 | FCASG               | GGG           | TLYFGA    | ✓                              | -    | ✓       | ✓       | -     | ✓      |            |
| 1-1-50 | 17   | 2  | 2-1 | LCASS               | ATGD          | AEQFFGP   | ✓                              | ✓    | ✓       | ✓       | -     | ✓      |            |
|        | 20   | 1  | 1-6 | LCGA                | <b>LRDR</b>   | NSPLYFAA  | ✓                              | ✓    | -       | ✓       | ✓     | ✓      |            |
| 1-1-58 | 13-2 | 2? | 2-4 | FCASG               | GGG           | TLYFGA    | ✓                              | -    | ✓       | ✓       | -     | ✓      |            |
| 1-1-62 | 2    | ?  | 2-2 | FCASSQ              | <b>DDA</b>    | NTGQLYFGE | ✓                              | ✓    | ✓       | ✓       | ✓     | -      |            |
| 1-1-63 | 13-3 | 2  | 2-7 | FCASS               | <b>EGGTGG</b> | YEYQYFGP  | ✓                              | ✓    | -       | ✓       | ✓     | ✓      |            |
| 1-1-74 | 13-1 | 1  | 2-7 | FCASS <b>D</b>      | AGTGG         | YEYQYEGP  | -                              | ✓    | -       | ✓       | -     | ✓      | D:germline |
| 1-1-78 | 5?   | 1  | 2-7 | ASSQ                | <b>EGTGG</b>  | YEYQYFGP  | -                              | ✓    | -       | ✓       | -     | ✓      |            |
| 1-2-2  | 13-3 | 1  | 2-7 | FCASS <b>D</b>      | AGTGG         | YEYQYFGP  | -                              | ✓    | -       | ✓       | -     | ✓      | D:germline |
| 1-2-10 | 1    | 2? | 1-1 | YCTCSA              | AGGG          | TEVFFGK   | ✓                              | ✓    | ✓       | -       | ✓     | ✓      |            |
| 1-2-12 | 1    | 2? | 1-1 | YCTCSA              | AGGG          | TEVFFGK   | ✓                              | ✓    | ✓       | -       | ✓     | ✓      |            |
|        | 19   | 2  | 2-7 | LCASSI              | VGTGG         | YEYQYFGP  | -                              | ✓    | -       | ✓       | ✓     | ✓      |            |
| 1-2-14 | 19   | 2? | 2-7 | LCASS               | MGGR          | YEYQYFGP  | ✓                              | -    | ✓       | -       | ✓     | ✓      |            |
| 1-2-34 | 29   | 2  | 2-7 | FCAS                | <b>RDWID</b>  | EQYFGP    | ✓                              | -    | ✓       | ✓       | ✓     | ✓      |            |
| 1-2-38 | 17   | 2  | 2-7 | LCASSR              | <b>DLTGG</b>  | YEYQYFGP  | -                              | ✓    | ✓       | ✓       | -     | ✓      |            |
| 1-2-50 | 13-3 | ?  | 2-7 | FCASS               | <b>ERS</b>    | SYEQYFGP  | ✓                              | ✓    | ✓       | ✓       | ✓     | -      |            |
| 1-2-54 | 19   | 1  | 2-7 | LCASSI              | <b>DRGE</b>   | QYFGP     | -                              | -    | ✓       | ✓       | ✓     | ✓      |            |
| 1-2-86 | 19   | 2  | 2-7 | LCASSI              | GGTGG         | YEYQYFGP  | -                              | ✓    | -       | ✓       | -     | ✓      |            |
| 1-2-89 | 19   | 2  | 2-7 | LCASSI              | SGTGG         | YEYQYFGP  | ✓                              | ✓    | -       | ✓       | ✓     | ✓      |            |

Individual T cells sorted after tetramer labeling were used for RT-PCR and sequencing. Negatively charged amino acid residues in the first part of the CDR3 $\beta$  segment are highlighted in bold and red. Vb del: deletion of nucleotide(s)

on 3' part of BV germline, add\*: addition of nucleotide(s) between BV and BD, D5' del: deletion of nucleotide(s) on 5' part of BD germline, D3' del: deletion of nucleotide(s) on 3' part of BD germline, add\*\*: addition of nucleotide(s) between BD and BJ, Jb del: deletion of nucleotide(s) on 5' part of BJ germline ✓: deletion or addition of nucleotide(s), -: no deletion or no addition, ✓: deletion or addition of nucleotide(s) responsible for the coding of a negatively-charged residue in the first part of CDR3 $\beta$ . The amino acid sequences after "CTC" in TRBV1, "LCG" in TRBV20, "CAW" in TRBV31, or "CAS" in all other TRBVs and before "YF", "FF" "TF" or "LF" in TRBJs were defined as CDR3 $\beta$ . The N-terminal region of CDR3 $\beta$  was defined as the first half of CDR3 $\beta$ .

**Table S6.** Nucleotide sequences of CDR3 $\beta$  segments of I-A<sup>97</sup>HEL<sub>11-27</sub> 9G and 9E tetramer-reactive T cells

**TCR V $\beta$  sequences of I-A<sup>97</sup>HEL/tet+ CD4 cells**

| Cell#    | BV   | BD | BJ  | Nucleic acid sequence      |                      |                                     |
|----------|------|----|-----|----------------------------|----------------------|-------------------------------------|
|          |      |    |     | Vb germline                | nDbn                 | Jb germline                         |
| 1-2.2    | 13-3 | 1  | 1-1 | ttc tgt gcc agc agt ga     | g cgg aca ggg aag    | aca gaa gtc ttc ttt ggt aaa gga     |
| 1-2.3    | 13-3 | 2  | 2-5 | ttc tgt gcc agc a          | ag act ggg ggg       | aac caa gac acc cag tac ttt ggg cca |
| 3-1.1.12 | 29   | 1  | 2-1 | ttc tgt gct agc agt tta    | aac agg g            | ac tat gct gag cag ttc ttc gga cca  |
| 3-1.1.35 | 13-3 | 1  | 1-3 | ttc tgt gcc agc agt        | tgg gac agg g        | ct gga aat acg ctc tat ttt gga gaa  |
| 3-1.1.39 | 15   | 1  | 1-6 | ctg tgt gcc agc agt tta g  | ag gac agg ggg       | tat aat tcg ccc ctc tac ttt cgg gca |
| 4-t2     | 29   | 1  | 2-7 | ttc tgt gct agc agt tta tc | t ggg aca ggg ggg tg | t gaa cag tac ttc ggt ccc           |
| 4-t7     | 4    | 1  | 1-2 | ctc tgt gcc agc ag         | a ccc ggg aca ggg gc | c tcc gac tac acc ttc ggc tca       |
| 4-1.1.3  | 13-3 | 1  | 1-3 | ttc tgt gcc agc agt        | tgg gac agg g        | ct gga aat acg ctc tat ttt gga gaa  |
| 4-1.1.11 | 19   | 2  | 2-7 | ctc tgt gcc agc agt ata g  | gc ggg act ggg ggg   | tat gaa cag tac ttc ggt ccc         |
| 4-1.1.13 | 19   | 1  | 2-5 | ctc tgt gcc agc a          | tt ccg gga ca        | c caa gac acc cag tac ttt ggg cca   |
| 4-1.1.14 | 5    | 2  | 2-7 | ttt tgt gcc agc agc caa g  | ga ggg act ggg gg    | c tat gaa cag tac ttc ggt ccc       |
| 4-1.1.15 | 13-3 | 1  | 2-7 | ttc tgt gcc agc agt ga     | g cga cag ag         | c tat gaa cag tac ttc ggt ccc       |
| 4-1.1.16 | 29   | 1  | 2-5 | ttc tgt gct agc a          | gg agg gac agg gag   | gac acc cag tac ttt ggg cca         |
| 4-1.1.23 | 13-3 | 1  | 1-3 | ttc tgt gcc agc agt        | tgg gac agg g        | ct gga aat acg ctc tat ttt gga gaa  |
| 4-1.1.34 | 3    | 1  | 1-2 | ttc tgt gcc agc agc tta g  | ac agg gtg gg        | a aac tcc gac tac acc ttc ggc tca   |
| 4-1.1.53 | 13-2 | 2  | 2-7 | ttc tgt gcc agc ggt ga     | g gga ctg ggg ggg    | tat gaa cag tac ttc ggt ccc         |
| 4-1.1.54 | 5    | 1  | 2-7 | ttt tgt gcc agc agc caa ga | a ggg aca ggg gg     | c tat gaa cag tac ttc ggt ccc       |
| 4-1.1.56 | 29   | 2  | 2-7 | ttc tgt gct agc agt tta    | gcc ggg act ggg gga  | tat gaa cag tac ttc ggt ccc         |
| 4-1.1.58 | 13-3 | 1  | 2-7 | ttc tgt gcc agc agt ga     | c aga ag             | c tcc tat gaa cag tac ttc ggt ccc   |
| 4-1.1.64 | 5    | 2  | 2-7 | ttt tgt gcc agc agc caa ga | g ggg act ggg ggg    | tat gaa cag tac ttc ggt ccc         |
| 4-1.1.65 | 2    | 1  | 1-2 | ttc tgt gcc agc agc        | gaa ggg ggg aca a    | ca aac tcc gac tac acc ttc ggc tca  |
| 4-1.1.67 | 5    | 2  | 2-7 | ttt tgt gcc agc agc caa ga | t ggg act ggg ggt    | tat gaa cag tac ttc ggt ccc         |
| 4-1.1.73 | 29   | 1  | 2-1 | ttc tgt gct agc agt tta tc | c gat ccc aga        | aac tat gct gag cag ttc ttc gga cca |
| 4-1.1.91 | 13-3 | 1  | 2-7 | ttc tgt gcc agc agt gat g  | cc ggg aca ggg gg    | c tat gaa cag tac ttc ggt ccc       |
| 4-1.1.96 | 13-3 | 1  | 1-3 | ttc tgt gcc agc agt        | tgg gac agg g        | ct gga aat acg ctc tat ttt gga gaa  |

**TCR V $\beta$  sequences of I-A<sup>97</sup>HEL<sub>9E</sub>/tet+ CD4 cells**

| Cell#  | BV   | BD | BJ  | Nucleic acid sequence      |                       |                                        |
|--------|------|----|-----|----------------------------|-----------------------|----------------------------------------|
|        |      |    |     | Vb germline                | nDbn                  | Jb germline                            |
| 1-1-10 | 19   | 2  | 2-7 | ctc tgt gcc agc agt ata g  | ga ggg act ggg ggg    | tat gaa cag tac ttc ggt ccc            |
| 1-1-14 | 2    | 2  | 2-4 | ttc tgt gcc agc agc caa ga | t ttg gtt             | agt caa aac acc ttg tac ttt ggt cgg    |
| 1-1-18 | 19   | 1  | 2-7 | ctc tgt gcc agc agt ata g  | cc ggg aca ggg gg     | c tat gaa cag tac ttc ggt ccc          |
| 1-1-42 | 13-2 | 2? | 2-4 | ttc tgt gcc agc ggt g      | gg ggg gg             | c acc ttg tac ttt ggt cgg              |
| 1-1-50 | 17   | 2  | 2-1 | ctc tgt gct agc agt        | gcg act ggg g         | at gct gag cag ttc ttc gga cca         |
|        | 20   | 1  | 1-6 | ctc tgt ggt gct            | ctc cgg gac aga       | aat tcg ccc ctc tac ttt cgg gca        |
| 1-1-58 | 13-2 | 2? | 2-4 | ttc tgt gcc agc ggt g      | gg ggg gg             | c acc ttg tac ttt ggt cgg              |
| 1-1-62 | 2    | ?  | 2-2 | ttc tgt gcc agc agc caa ga | t gat g               | ca aac acc ggg cag ctc tac ttt ggt gaa |
| 1-1-63 | 13-3 | 2  | 2-7 | ttc tgt gcc agc agt ga     | g ggg ggg act ggg ggt | tat gaa cag tac ttc ggt ccc            |
| 1-1-74 | 13-1 | 1  | 2-7 | ttc tgt gcc agc agt gat g  | ca ggg aca ggg gg     | c tat gaa cag tac ttc ggt ccc          |
| 1-1-78 | 5?   | 1  | 2-7 | gcc agc agc caa ga         | a ggg aca ggg gg      | c tat gaa cag tac ttc ggt ccc          |
| 1-2-2  | 13-3 | 1  | 2-7 | ttc tgt gcc agc agt gat g  | cg ggg aca ggg gg     | c tat gaa cag tac ttc ggt ccc          |
| 1-2-10 | 1    | 2? | 1-1 | tac tgc acc tgc agt gca g  | cg ggg ggc gg         | c aca gaa gtc ttc ttt ggt aaa          |
| 1-2-12 | 1    | 2? | 1-1 | tac tgc acc tgc agt gca g  | cg ggg ggc gg         | c aca gaa gtc ttc ttt ggt aaa          |
|        | 19   | 2  | 2-7 | ctc tgt gcc agc agt ata g  | ta ggg act ggg ggt    | tat gaa cag tac ttc ggt ccc            |
| 1-2-14 | 19   | 2? | 2-7 | ctc tgt gcc agc agt at     | g ggg ggg cg          | c tat gaa cag tac ttc ggt ccc          |
| 1-2-34 | 29   | 2  | 2-7 | ttc tgt gct agc ag         | g gac tgg atc g       | at gaa cag tac ttc ggt ccc             |
| 1-2-38 | 17   | 2  | 2-7 | ctc tgt gct agc agt aga ga | t cta act ggg ggg     | tat gaa cag tac ttc ggt ccc            |
| 1-2-50 | 13-3 | ?  | 2-7 | ttc tgt gcc agc agt ga     | a cgg ag              | c tcc tat gaa cag tac ttc ggt ccc      |
| 1-2-54 | 19   | 1  | 2-7 | ctc tgt gcc agc agt ata g  | ac agg ggg ga         | a cag tac ttc ggt ccc                  |
| 1-2-86 | 19   | 2  | 2-7 | ctc tgt gcc agc agt ata g  | gg ggg act ggg ggg    | tat gaa cag tac ttc ggt ccc            |
| 1-2-89 | 19   | 2  | 2-7 | ctc tgt gcc agc agt ata    | tcg ggg act ggg gga   | tat gaa cag tac ttc ggt ccc            |

Individual T cells sorted after tetramer labeling were used for RT-PCR and sequencing.

**Table S7.** Data collection and refinement statistics for I-A<sup>97</sup>GAD<sub>221-235</sub>

| <b>Data processing</b>                   |                          |
|------------------------------------------|--------------------------|
| Resolution range (Å)                     | 38.45- 3.09 (3.15- 3.09) |
| Unique reflections                       | 10,586 (509)             |
| Completeness (%)                         | 98.7 (99.4)              |
| Redundancy                               | 4.9                      |
| <sup>a</sup> R <sub>sym</sub> (%)        | 12.8 (68.2)              |
| Average I/σ(I)                           | 10.6 (1.8)               |
| <b>Refinement</b>                        |                          |
| Reflections                              | 10,023                   |
| Reflections(test)                        | 563                      |
| <sup>b</sup> R <sub>cryst</sub> (%)      | 23.2 (28.7) <sup>c</sup> |
| <sup>d</sup> R <sub>free</sub> (%)       | 28.6 (31.2)              |
| Residues/protein atoms                   | 358/2924                 |
| <sup>e</sup> Coordinate error (Å)        | 0.41                     |
| rmsd bonds/angles (Å/deg.)               | 0.003/0.638              |
| Average B values(Å <sup>2</sup> )        |                          |
| I-A <sup>97</sup>                        | 73.5                     |
| Peptide GAD <sub>221-235</sub>           | 67.4                     |
| <sup>f</sup> Ramachandran statistics (%) |                          |
| Most favored                             | 87.3                     |
| Additionally allowed                     | 12.1                     |
| Generously allowed                       | 0.3                      |
| Disallowed                               | 0.3                      |

Values in parentheses refer to the highest resolution shell.

<sup>a</sup>R<sub>sym</sub> = 100 Σ<sub>h</sub> Σ<sub>i</sub> | I<sub>i</sub>(h) - <I(h)> | / Σ<sub>h</sub> I(h) where I<sub>i</sub>(h) is the *i*th measurement of the *h* reflection and < I(h) > is the average value of the reflection intensity.

<sup>b</sup>R<sub>cryst</sub> = Σ||F<sub>o</sub>| - |F<sub>c</sub>|| / Σ|F<sub>o</sub>|, where F<sub>o</sub> and F<sub>c</sub> are the observed and calculated structure factor amplitudes within the set of reflections used for refinement.

<sup>c</sup>Shell resolution 3.4 - 3.1Å.

<sup>d</sup> $R_{\text{free}} = \sum ||F_o| - |F_c|| / \sum |F_o|$  calculated for a randomly selected set of structure factors (~5%) throughout the resolution range and not used in refinement.

<sup>e</sup>Values are based on maximum likelihood.

<sup>f</sup>The Ramachandran plot was generated with PROCHECK.

**Table S8.** Data collection and refinement statistics for TCR 21.30/I-A<sup>97</sup>HEL<sub>11-27</sub>

| <b>Data processing</b>                          |                            |
|-------------------------------------------------|----------------------------|
| Resolution range (Å)                            | 48.26 - 2.88 (2.98 - 2.88) |
| Unique reflections                              | 43435 (1590)               |
| Completeness (%)                                | 68.9 (26.4)                |
| Redundancy                                      | 1.99                       |
| <sup>a</sup> R <sub>sym</sub> (%)               | 11.2 (43.2)                |
| Average I/σ(I)                                  | 13.0 (0.98)                |
| <b>Refinement</b>                               |                            |
| Reflections                                     | 34208                      |
| Reflections (test)                              | 727                        |
| <sup>b</sup> R <sub>cryst</sub> (%)             | 25.3 (37.3) <sup>c</sup>   |
| <sup>d</sup> R <sub>free</sub> (%)              | 28.1 (42.1)                |
| Residues/protein atoms                          | 1614/12944                 |
| <sup>e</sup> Coordinate error (Å)               | 0.54                       |
| rmsd bonds/angles (Å / deg.)                    | 0.007/1.002                |
| <sup>f</sup> Average B values (Å <sup>2</sup> ) |                            |
| Monomer 1 (chains A,B,C,D,P)                    |                            |
| TCR 21.30                                       | 51                         |
| I-A <sup>97</sup> HEL <sub>11-27</sub>          | 53                         |
| Monomer 2 (chains E,F,G,H,Q)                    |                            |
| TCR 21.30                                       | 95                         |
| I-A <sup>97</sup> HEL <sub>11-27</sub>          | 89                         |
| <sup>g</sup> Ramachandran statistics (%)        |                            |
| Most favored                                    | 76.9                       |
| Additionally allowed                            | 21.5                       |
| Generously allowed                              | 1.4                        |
| Disallowed                                      | 0.1                        |

Values in parentheses refer to the highest resolution shell.

<sup>a</sup>R<sub>sym</sub> = 100 Σ<sub>h</sub> Σ<sub>i</sub> | I<sub>i</sub>(h) - <I(h)> | / Σ<sub>h</sub> I(h) where I<sub>i</sub>(h) is the *i*th measurement of the *h* reflection and < I(h) > is the average value of the reflection intensity.

<sup>b</sup> $R_{\text{cryst}} = \sum ||F_o| - |F_c|| / \sum |F_o|$ , where  $F_o$  and  $F_c$  are the observed and calculated structure factor amplitudes within the set of reflections used for refinement.

<sup>c</sup>Shell resolution 3.11 - 2.88Å.

<sup>d</sup> $R_{\text{free}} = \sum ||F_o| - |F_c|| / \sum |F_o|$  calculated for a randomly selected set of structure factors (~2%) throughout the resolution range and not used in refinement.

<sup>e</sup>Values are based on maximum likelihood.

<sup>f</sup>Average B values include TLS contributions. Significantly higher B values (>120 Å<sup>2</sup>) were obtained using the original data prior to anisotropic correction.

<sup>g</sup>The Ramachandran plot was generated with PROCHECK.

**Table S9.** Contacts between TCR 21.30 and I-A<sup>97</sup>HEL<sub>11-27</sub>**Contacts between TCR and HEL peptide**

|                 |           |   |          |   |              |                   |
|-----------------|-----------|---|----------|---|--------------|-------------------|
| CDR1 $\alpha$ : | C THR 27  | - | P MET 12 | 3 | VDW contacts |                   |
|                 | C THR 28  | - | P HIS 15 | 3 | VDW contacts |                   |
|                 | C LYS 37  | - | P ASP 18 | 4 | VDW contacts | + 1 hydrogen bond |
| CDR3 $\alpha$ : | C GLY 110 | - | P LYS 13 | 4 | VDW contacts |                   |
|                 | C GLY 110 | - | P HIS 15 | 2 | VDW contacts |                   |
|                 | C SER 112 | - | P LYS 13 | 3 | VDW contacts |                   |

**Total contacts = 20**

|                |           |   |          |   |              |                   |
|----------------|-----------|---|----------|---|--------------|-------------------|
| CDR1 $\beta$ : | D ASN 28  | - | P GLY 26 | 1 | VDW contacts |                   |
|                | D ASP 37  | - | P ARG 21 | 7 | VDW contacts | + 1 hydrogen bond |
|                | D TYR 38  | - | P ARG 21 | 1 | VDW contacts |                   |
| CDR3 $\beta$ : | D TRP 108 | - | P GLY 22 | 1 | VDW contacts |                   |
|                | D TRP 108 | - | P SER 24 | 3 | VDW contacts |                   |
|                | D ASP 109 | - | P TYR 20 | 2 | VDW contacts |                   |
|                | D ASP 109 | - | P ARG 21 | 7 | VDW contacts | + 1 hydrogen bond |
|                | D ARG 110 | - | P ASP 18 | 8 | VDW contacts |                   |
|                | D ARG 110 | - | P ASN 19 | 2 | VDW contacts | + 1 hydrogen bond |

**Total contacts = 35****Contacts between TCR and MHC**

|           |   |          |   |              |                    |
|-----------|---|----------|---|--------------|--------------------|
| C THR 27  | - | B HIS 81 | 1 | VDW contacts |                    |
| C THR 28  | - | B THR 77 | 4 | VDW contacts |                    |
| C THR 28  | - | B HIS 81 | 3 | VDW contacts | + 1 hydrogen bond  |
| C LYS 37  | - | B ARG 70 | 1 | VDW contacts |                    |
| C TYR 55  | - | B ARG 70 | 1 | VDW contacts |                    |
| C ALA 57  | - | B GLU 69 | 6 | VDW contacts | + 1 hydrogen bond  |
| C ALA 57  | - | B ARG 70 | 3 | VDW contacts |                    |
| C ALA 57  | - | B ALA 73 | 1 | VDW contacts |                    |
| C GLN 64  | - | B ARG 72 | 1 | VDW contacts |                    |
| C GLN 64  | - | B ALA 73 | 4 | VDW contacts |                    |
| C LYS 67  | - | B GLU 69 | 5 | VDW contacts |                    |
| C SER 84A | - | B THR 77 | 2 | VDW contacts |                    |
| C ARG 85  | - | B GLU 85 | 1 | VDW contacts |                    |
| C GLU 107 | - | B ARG 70 | 4 | VDW contacts | + 2 hydrogen bonds |
| C GLY 110 | - | A GLU 55 | 4 | VDW contacts |                    |
| C SER 112 | - | A GLU 55 | 5 | VDW contacts |                    |
| C GLY 113 | - | A GLU 55 | 1 | VDW contacts |                    |
| C GLY 113 | - | A GLN 57 | 1 | VDW contacts |                    |
| C ASN 114 | - | A GLN 61 | 3 | VDW contacts | + 1 hydrogen bond  |

**Total contacts = 56**



|           |   |          |   |              |                   |
|-----------|---|----------|---|--------------|-------------------|
| D TYR 38  | - | A GLN 61 | 6 | VDW contacts | + 1 hydrogen bond |
| D TYR 55  | - | A GLN 57 | 0 | VDW contacts | + 1 hydrogen bond |
| D TYR 55  | - | A GLN 61 | 1 | VDW contacts |                   |
| D TYR 57  | - | A GLN 57 | 5 | VDW contacts |                   |
| D TYR 57  | - | A LEU 60 | 2 | VDW contacts |                   |
| D TYR 57  | - | A GLN 61 | 5 | VDW contacts |                   |
| D TYR 57  | - | A ALA 64 | 2 | VDW contacts |                   |
| D GLU 67  | - | A GLN 57 | 3 | VDW contacts |                   |
| D TRP 108 | - | B TYR 60 | 2 | VDW contacts |                   |
| D TRP 108 | - | B TYR 66 | 1 | VDW contacts |                   |
| D TRP 108 | - | A HIS 68 | 2 | VDW contacts |                   |
| D ASP 109 | - | B TYR 66 | 2 | VDW contacts |                   |
| D ARG 110 | - | A ASN 62 | 5 | VDW contacts | + 1 hydrogen bond |
| D ARG 110 | - | A GLN 61 | 3 | VDW contacts |                   |
| D ARG 110 | - | A ALA 65 | 1 | VDW contacts |                   |
| D ARG 110 | - | B ARG 70 | 1 | VDW contacts |                   |
| D ALA 112 | - | B ARG 70 | 0 | VDW contacts | + 1 hydrogen bond |

**Total contacts = 45**

Chains A + B: I-A<sup>g7</sup> alpha and beta chains, respectively. Chain P: HEL peptide

Chains C + D: TCR 21.30 alpha and beta chains, respectively.

**Table S10.** TCR 21.30 SPR measurements

| Peptide                 | TCR 21.30                                                                                                                                      | TCR 21.30 CDR3 $\beta$ 97 E $\rightarrow$ G                                                                                              |
|-------------------------|------------------------------------------------------------------------------------------------------------------------------------------------|------------------------------------------------------------------------------------------------------------------------------------------|
| HEL <sub>11-27</sub>    | $K_{ass}$ : 18485 +/- 3997 M <sup>-1</sup> s <sup>-1</sup><br>$K_{diss}$ : 0.0028 +/- 0.0005 s <sup>-1</sup><br>$K_D$ : 0.162 +/- 0.04 $\mu$ M | $K_{ass}$ : 7990 +/- 12 M <sup>-1</sup> s <sup>-1</sup><br>$K_{diss}$ : 0.030 +/- 0.0016 s <sup>-1</sup><br>$K_D$ : 3.76 +/- 0.2 $\mu$ M |
| HEL <sub>11-27</sub> 9E | $K_{ass}$ : 4013 +/- 735 M <sup>-1</sup> s <sup>-1</sup><br>$K_{diss}$ : 0.019 +/- 0.0096 s <sup>-1</sup><br>$K_D$ : 5.02 +/- 2.8 $\mu$ M      | $K_{ass}$ : NM<br>$K_{diss}$ : NM<br>$K_D$ : NM                                                                                          |

Affinity measurements of TCR 21.30 or mutant TCR 21.30 (CDR3 $\beta$  97 E  $\rightarrow$  G) with I-A<sup>g7</sup>HEL<sub>11-27</sub> and I-A<sup>g7</sup>HEL<sub>11-27</sub>9E. Numbers are the average of 3 independent experiments. NM indicates a non-measurable reading.  $K_D = K_{diss}/K_{ass}$ .

**Table S11.** List of the TCR  $\beta$  specific primers used for isolating and sequencing the respective CDR3 $\beta$

| <b>Primer</b>   | <b>Nucleotide sequence</b>     |
|-----------------|--------------------------------|
| TRBV1 external  | CTA CAG ACC CCA CAG TGA C      |
| TRBV2 external  | AGT ATC TAG GCC ACA ATG C      |
| TRBV3 external  | GAA GCA GGA CAC ACA GGA C      |
| TRBV4 external  | AAT TGC TGA AGA TTA TGT TTA GC |
| TRBV5 external  | GGA AAC AGC ACT CAT GAA CAC    |
| TRBV12 external | CTC YTG GGA ACA AGT TCA GC     |
| TRBV13 external | TGK GWR CAA AAC ACA TGG AGG C  |
| TRBV14 external | TCT CCT TGA CAC AGT ACT GTC    |
| TRBV15 external | GCA AGT CTC TTA TGG AAG ATG G  |
| TRBV16 external | GAG AGC AGA ACC AAC AAA TGC    |
| TRBV17 external | TGC AGC CAC TTT TGT GGA TAC    |
| TRBV19 external | CAC ATG GTG ATG GTG GCA TC     |
| TRBV20 external | TTC TGG GGC CTG GCT GTG        |
| TRBV23 external | TTA CAC AGA AGC CAA GAT A      |
| TRBV24 external | GCA GGC TCT TTT GTT GCT GG     |
| TRBV26 external | CAA GAT ATC TGG TGA AAG GGC    |
| TRBV29 external | GAA CAG GCC TTG TGG ACA TG     |
| TRBV30 external | TGT CCT CCT CTA CCA AAA GC     |
| TRBV31 external | GCT CAG ACT ATC CAT CAA TGG    |
| TRBC external   | CTA TAA TTG CTC TCC TTG TAG G  |

**Primer****Nucleotide sequence**

|                 |                               |
|-----------------|-------------------------------|
| TRBV1 internal  | CTT GAA GAA TTC CCA GTA TCC C |
| TRBV2 internal  | CTT ATG GAC AAT CAG ACT GCC   |
| TRBV3 internal  | GTG ACC CAG TTT CTA ATC ACC   |
| TRBV4 internal  | GTA AAC GAA ACA GTT CCA AGG C |
| TRBV5 internal  | CTT TGG AAT GTG AGC AAC ATC   |
| TRBV12 internal | GCA GAT TCT CAG TCC AAC AG    |
| TRBV13 internal | ATG TAC TGG TAT CGG CAG GAC   |
| TRBV14 internal | CTG TTT CCT TTT GGT GTG ACC   |
| TRBV15 internal | CTA AAT TCA TCC TTC TCC ACT C |
| TRBV16 internal | CAA GAA GCA ACT CTG TGG TG    |
| TRBV17 internal | GCA AGA GTT GGA AAA CCA GTG   |
| TRBV19 internal | CAG GGA AAG GAT TGA GAC TG    |
| TRBV20 internal | GAA GAA CCA TCT GTA AGA GTG G |
| TRBV23 internal | AAA ATG AAA GGC CAG GAA GC    |
| TRBV24 internal | CCT GGT CAA AGA GAA AGG AC    |
| TRBV26 internal | CTT CAG CAA ATA GAC ATG ACT G |
| TRBV29 internal | GAA TGT GGA CAG GAC ATG AG    |
| TRBV30 internal | GCT GAC AGT CAA GTT GTT TCG   |
| TRBV31 internal | CTA ACC TCT ACT GGT ACT GG    |
| TRBC internal   | AAG CCC CTG GCC AAG CAC AC    |
